# Supplementary material for: Label-Free Sequence-Specific Visualization of LAMP Amplified Salmonella via DNA Machine Produces G-Quadruplex DNAzyme
Source: MDPI journal article supplement (doi:10.3390/bios13050503), 2023-04-26
Supplement: s1 [file s1]

Supporting Information

# Label-Free Sequence-Specific Visualization of LAMP Amplified *Salmonella* via DNA Machine Produces G-Quadruplex DNzyme

Huan Zeng <sup>1</sup>, Shuqin Huang <sup>1</sup>, Yunong Chen <sup>1,2</sup>, Minshi Chen <sup>3</sup>, Kaiyu He <sup>2</sup>, Caili Fu <sup>1</sup>, Qiang Wang <sup>2</sup>, Fang Zhang <sup>1,\*</sup>, Liu Wang <sup>2,4,\*</sup> and Xiahong Xu <sup>2</sup>

<sup>1</sup> College of Biological Science and Engineering, Fuzhou University, Fuzhou 350108, China; 210820068@fzu.edu.cn (H.Z.); 200820041@fzu.edu.cn (S.H.); yunong0420@163.com (Y.C.); caili\_fu@hotmail.com (C.F.)

<sup>2</sup> Institute of Agro-product Safety and Nutrition, Zhejiang Academy of Agricultural Sciences, Hangzhou 310021, China; hekaiyu@zaas.ac.cn (K.H.); wq13575733860@126.com (Q.W.); xuxiahong@zaas.ac.cn (X.X.)

<sup>3</sup> Technology Center of Fuzhou Customs, Fuzhou 350015, China; minshi0271@sina.com

<sup>4</sup> Key Laboratory of Traceability for Agricultural Genetically Modified Organisms, Ministry of Agriculture and Rural Affairs, Hangzhou 310021, China

\* Correspondence: fangzh921@fzu.edu.cn or zhangfang921@gmail.com (F.Z.); wangliually@126.com (L.W.)

## 1. Supplementary Tables and Figures

### 1.1. Supplementary Tables

**Table S1.** Sequences employed in this work.

| Oligonucleotides <sup>a</sup> | Sequence (5'-3') <sup>b,c,d</sup>                                |
|-------------------------------|------------------------------------------------------------------|
| FIP                           | TCCCGGCAGAGTTCCTTGAATCATGAC-GCAGCTGTTGAA                         |
| BIP                           | TTCCCGCTGCCGGTATTTGTTGCTACGTTTTGCTTCAC-GGA                       |
| F3                            | GCGATAATATGGGGCGGAAT                                             |
| B3                            | CGCCTTTGCTGGTTTTAGGT                                             |
| LF                            | TATTCGGTGGTTTAAAGCGTACTC                                         |
| LB                            | GCCGTAACAACCAATACAAATGG                                          |
| Nick-FIP                      | TCCCGGCAGAGTTCCTTGAAGAGTCATCATGAC-GCAGCTGTTGAA                   |
| Nick-BIP                      | TTCCCGCTGCCGGTATTTGTTGAGTCGCTACGTTTT-GCTTCACGGA                  |
| M-G                           | <b><u>TCCCAACCCGCCCTACCC</u></b> TTTGTACTCGGCAGAG-TTCCCATTTGAAAT |

<sup>a</sup> FIP and BIP are inner primers. F3 and B3 are outer primers. LF and LB are loop primers. Nick-FIP and Nick BIP are FIP and BIP, respectively, incorporated with a nicking endonuclease recognition site. M-G is the molecular machine. <sup>b</sup> Underlined letters indicate the recognition site of Nt.BstNBI. <sup>c</sup> Italic letters in bold indicate the complementary bases of the recognition site of Nt.BstNBI. <sup>d</sup> Underlined letters in bold indicate the complementary sequence of the G-rich sequence.

1.2. Supplementary Figures

781 CGTAAATGGC GATAGCGATA ATATGGGGCG GAATATCATG ACGCAGCTGT TGAACAACCC

841 ATTTGTATTG GTTGTTACGG CTATTTTGAC CATTCAATG GGAACCTGCG CGGGATTCCC

901 ACTGCCGGTT TTTGTTATT TATCGGTGGT TTTAAGCGTA CTCTTCTATT TTAATTCG

961 TGAAGCAAAA CGTAGCGCCG CCAAACCTAA AACCAGCAAA GGCGAGCAGC CGCTCAGTAT

Figure S1. Template sequence for LAMP-Res-Nick amplification of the *invA* gene of *Salmonella*.

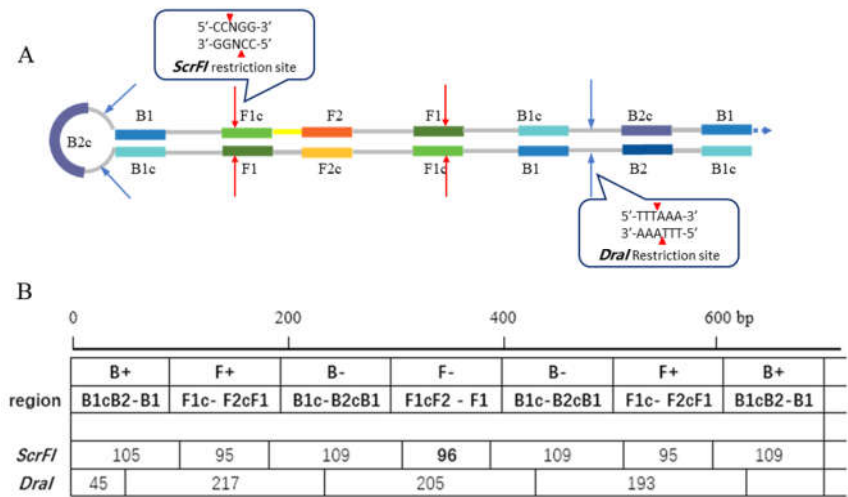

Figure S2. The effect of restriction endonuclease, *ScrFI*, and *DraI*, on cleaving LAMP products of *invA* gene of *Salmonella*. (A) Scheme illustrating the restriction sites of *ScrFI* and *DraI* on the long stem-loop structure of LAMP products. Red arrows indicate the restriction site of *ScrFI*. And the blue arrows indicate the restriction site of *DraI*. (B) The expected LAMP products extended from Nick-FIP. The numbers in the box denote the expected length of the amplification products.
